# Supplementary material for: Indirect Enantioseparations: Recent Advances in Chiral Metabolomics for Biomedical Research
Source: MDPI journal article supplement (doi:10.3390/ijms23137428), 2022-07-04
Supplement: s1 [file s1]

**Table S1:** Indirect separation conditions reported in original research articles**Table S2:** Strategies implemented in untargeted chiral metabolomics studies**Table S3:** IMS of chiral AAs. Studies reporting technologies operating in low electric fields**Table S1.** Indirect separation conditions reported in original research articles

| Analytes                            | Matrix                         | CDA           | Analytical technique | Separation conditions                                                                                        | Run time | LOD [M]           | Ref. |
|-------------------------------------|--------------------------------|---------------|----------------------|--------------------------------------------------------------------------------------------------------------|----------|-------------------|------|
| Amino acids                         | Protein hydrolysate, standards | FDAA          | LC-MS                | Stationary phase: C18; Mobile phase: A:FA/NH <sub>4</sub> Ac 5 mM, B: ACN+FA/ACN; Gradient elution           | 60 min   | pM range          | [82] |
| Amino acids $\alpha$ -hydroxy acids | Depsipeptide                   | FDAA          | LC-MS                | Stationary phase: C18; Mobile phase: A: FA, B: MeOH; Gradient elution                                        | n.r.     | n.r.              | [43] |
| Amino acids                         | Tissue                         | FDLA          | LC-MS                | Stationary phase: C18; Mobile phase: A: HCO <sub>2</sub> NH <sub>4</sub> 5 mM, B: MeOH; Gradient elution     | n.r.     | n.r.              | [46] |
| All proteinogenic amino acids       | Standards                      | FDLA          | LC-MS                | Stationary phase: C18; Mobile phase: A: FA, B: ACN; Gradient elution                                         | 35 min   | n.r.              | [47] |
| Amino acids                         | Protein hydrolysate, standards | OPA/IBLC      | LC-MS                | Stationary phase: C18; Mobile phase: A:FA/NH <sub>4</sub> Ac 5 mM, B: ACN+FA/ACN; Gradient elution           | 60       | pM range          | [82] |
| Amino acids                         | Serum, plasma, urine           | OPA/IBLC      | LC-HRMS              | Stationary phase: C18; Mobile phase: A: NH <sub>4</sub> Ac 2.5 mM B: ACN+MeOH                                | 34       | 7.1-159.2 pM      | [71] |
| Trp                                 | Plasma, serum                  | OPA/NAC       | LC-CL                | Stationary phase: C18; Mobile phase: A: KH <sub>2</sub> PO <sub>4</sub> (pH 6.0), B: MeOH; Isocratic elution | n.r.     | <1.5 pM           | [72] |
| Primary and secondary amines        | Standards                      | OPA/NAC, FLEC | LC-FL                | Stationary phase: C18; Mobile phase: A: NaAc 50 mM (pH 5.6), B: MeOH; Gradient elution                       | 90 min   | 0.1-0.25 $\mu$ M  | [73] |
| All proteinogenic amino acids       | aCSF                           | FLEC          | MEKC-UV              | BGE: 40 mM borate buffer (pH-9.2), 21 mM SDS, 8.5%IPA,                                                       | 80 min   | 5 $\mu$ M         | [76] |
| All proteinogenic amino acids       | aCSF                           | FLEC          | MEKC-MS              | BGE: 150 mM APFO (pH-9.5)                                                                                    | 35 min   | 4-11 $\mu$ M      | [77] |
| All proteinogenic amino acids       | CSF                            | FLEC          | MEKC-MS              | BGE: 150 mM APFO (pH-9.5)                                                                                    | 50 min   | 0.4-5 $\mu$ M     | [78] |
| Ser, Asp, Asn, Glu, Gln             | aCSF                           | FLEC          | CE-MS                | BGE: 150 mM acetic acid, (pH 3.7)                                                                            | 25 min   | 0.19-0.36 $\mu$ M | [80] |
| 13 proteinogenic amino acids        | Standards                      | FLEC          | MEKC-FL              | BGE: 40 mM borate buffer (pH-9.2), 25 mM SDS, 15%IPA                                                         | 40 min   | 13-580 nM         | [79] |
| All proteinogenic amino acids       | Standards                      | FLEC          | LC-MS                | Stationary phase: Diphenyl / Biphenyl, Mobile phase: A: FA 50 mM, B: ACN; Gradient elution                   | 30 min   | n.r.              | [75] |
| Amino acids                         | Standards                      | FLEC          | IM-MS                | -/-                                                                                                          | n.r.     | n.r.              | [81] |

| Analytes                       | Matrix                            | CDA                     | Analytical technique | Separation conditions                                                                                           | Run time | LOD [M]                   | Ref.  |
|--------------------------------|-----------------------------------|-------------------------|----------------------|-----------------------------------------------------------------------------------------------------------------|----------|---------------------------|-------|
| All proteinogenic amino acids  | Plasma, urine, CSF                | NIFE                    | LC-MS                | Stationary phase: C18; Mobile phase: A: $\text{NH}_4\text{HCO}_3$ 10 mM (pH 9.5), B: ACN; Gradient elution      | 21 min   | <5 nM                     | [50]  |
| Amino acids                    | Protein hydrolysate, standards    | NIFE                    | LC-MS                | Stationary phase: C18; Mobile phase: A: FA/ $\text{NH}_4\text{Ac}$ 5 mM, B: ACN+FA/ACN; Gradient elution        | 60 min   | pM range                  | [82]  |
| Amino acids                    | Plasma                            | NIFE                    | LC-MS                | Stationary phase: C18; Mobile phase: A: $\text{NH}_4\text{HCO}_3$ 8 mM, B: ACN; Gradient elution                | 18 min   | 0.4-341.4 pM              | [85]  |
| Amino acids                    | Brain homogenates                 | NIFE                    | LC-MS                | Stationary phase: C18; Mobile phase: A: $\text{NH}_4\text{HCO}_3$ 8 mM, B: ACN; Gradient elution                | 41 min   | 0.4-95 pM                 | [86]  |
| Epinephrine, norepinephrine    | Plasma                            | NIFE                    | LC-MS                | Stationary phase: C18; Mobile phase: A: FA, B: ACN; Gradient elution                                            | n.r.     | 5-8.86 pM                 | [84]  |
| Amino acids                    | Milk                              | NIFE                    | LC-HRMS              | Stationary phase: C18; Mobile phase: A: $\text{NH}_4\text{HCO}_3$ 8 mM, B: ACN; Gradient elution                | 24 min   | 67 pM – 58 nM             | [83]  |
| Amino acids                    | Human nails                       | DBD-PyNCS               | LC-HRMS              | Stationary phase: C18; Mobile phase: A: FA/ $\text{NH}_4\text{Ac}$ 5 mM, B: ACN+FA/ACN; Gradient elution        | 35 min   | 0.5-375 nM                | [110] |
| Amino acids                    | Plasma, nails                     | DBD-PyNCS               | LC-HRMS              | Stationary phase: C18; Mobile phase: A: TFA/FA, B: ACN/MeOH; Gradient elution                                   | n.r.     | n.r.                      | [31]  |
| Trp, KYN                       | Serum                             | DBD-PyNCS               | LC-MS                | Stationary phase: HILIC; A: $\text{HCO}_2\text{NH}_4$ 10 mM (pH 5.0), B: ACN; Isocratic elution                 | 15 min   | 50 pM Trp, 4.0 pM KYN     | [88]  |
| Ser                            | Serum                             | DBD-PyNCS               |                      | Stationary phase: HILIC; Mobile phase: A: $\text{HCO}_2\text{NH}_4$ 100 mM, B: ACN; Isocratic elution           | n.r.     | 55 pM                     | [87]  |
| Trp, KYN                       | Standards                         | DBD-PyNCS               |                      | Stationary phase: HILIC; Mobile phase: A: $\text{HCO}_2\text{NH}_4$ 10 mM (pH 5.0), B: ACN; Isocratic elution   | n.r.     | 5.1-19 nM                 | [89]  |
| Lactic acid                    | Saliva (DSS)                      | NBD-Apy                 | LC-FL, LC-MS         | Stationary phase: C18; Mobile phase: A: FA, ACN, B: MeOH, THF; Isocratic elution                                | 20 min   | FL: 33.3 nM<br>MS: 6.6 nM | [24]  |
| Hydroxy/ amino acids           | Bone marrow, plasma               | DATAN                   | LC-HRMS              | Stationary phase: C18; Mobile phase: A: $\text{HCO}_2\text{NH}_4$ 10 mM (pH 3.6), B: ACN/MeOH; Gradient elution | 75 min   | n.r.                      | [91]  |
| LA                             | CSF, urine                        | DATAN                   | LC-MS                | Stationary phase: C18; Mobile phase: A: $\text{HCO}_2\text{NH}_4$ 2.5 mM (pH 3.6), B: ACN; Isocratic elution    | n.r.     | n.r.                      | [96]  |
| 2HG                            | Kidney tissue                     | DATAN                   | LC-MS                | Stationary phase: C18; Mobile phase: A: $\text{HCO}_2\text{NH}_4$ (pH 3.6), B: ACN; Gradient elution            | 25 min   | n.r.                      | [93]  |
| 2HG                            | Serum                             | DATAN                   | LC-MS                | Stationary phase: C18; Mobile phase: A: $\text{HCO}_2\text{NH}_4$ 2 mM (pH 3.1), B: ACN; Gradient elution       | n.r.     | 60 nM                     | [53]  |
| 2HG                            | Serum, plasma, bone marrow, urine | DATAN                   | LC-MS                | Stationary phase: C18; Mobile phase: A: $\text{HCO}_2\text{NH}_4$ (pH 3.6), B: ACN; Gradient elution            | 30 min   | n.r.                      | [112] |
| Amino and carboxylic compounds | Serum, saliva, brain homogenates  | DMT-Pro-OSu/<br>DMT-Apy | LC-MS                | Stationary phase: C18; Mobile phase: A: FA, B: ACN; Gradient elution                                            | 60 min   | n.r.                      | [100] |

| Analytes                 | Matrix                        | CDA                                                    | Analytical technique | Separation conditions                                                                                                 | Run time | LOD [M]                                             | Ref.  |
|--------------------------|-------------------------------|--------------------------------------------------------|----------------------|-----------------------------------------------------------------------------------------------------------------------|----------|-----------------------------------------------------|-------|
| Amino acids, amines      | Saliva                        | DMT-Pro-OSu                                            | LC-MS                | Stationary phase: C18, ADME; Mobile phase: A: different buffers, B: ACN, MeOH, THF; Isocratic elution                 | n.r.     | Amines: 0.02-2.9 nM, AA: 0.04-3.2 nM, Ser: 542.6 pM | [55]  |
| Carboxylic acids         | CSF                           | DMT-A/iDMT-A                                           | LC-MS                | Stationary phase: C18; Mobile phase: A: FA, B: ACN; Gradient elution                                                  | 60 min   | 0.04-44.25 nM                                       | [101] |
| Amines                   | CSF                           | DMT-(S)-PO/iDMT-(S)-PO                                 | LC-MS                | Stationary phase: C18; Mobile phase: A: FA, B: ACN; Gradient elution                                                  | 60 min   | 0.04-44.25 nM                                       | [101] |
| Carboxylic acids         | Standards, biological samples | DMT-Apy                                                | LC-MS                | Stationary phase: C18; Mobile phase: A: FA, B: ACN; Isocratic elution                                                 | n.r.     | n.r.                                                | [98]  |
| Amines, amino acids      | Standards, biological samples | DMT-Pro-OSu                                            | LC-MS                | Stationary phase: C18; ADME, Mobile phase: A: different buffers, B: ACN, MeOH, THF; Gradient elution                  | n.r.     | n.r.                                                | [98]  |
| Amino acids              | Crystallin                    | DMT-Pro-Osu                                            | LC-MS                | Stationary phase: C18; Mobile phase: A: FA, B: ACN; Gradient elution                                                  | 120 min  | n.r.                                                | [99]  |
| LA                       | Saliva                        | DMT-Apy                                                | LC-MS                | Stationary phase: C18; Mobile phase: A: FA, B: ACN; Isocratic elution                                                 | n.r.     | 6.00 pM                                             | [22]  |
| Carboxylic acids         | Saliva                        | DMT-Apy                                                | LC-MS                | Stationary phase: C18; Mobile phase: A: FA, B: ACN; Gradient elution                                                  | 20 min   | 3 pM - 330 nM                                       | [54]  |
| 2-HG                     | Human serum                   | DMT-Apy                                                | FAIMS/MS             | -/-                                                                                                                   | -        | -                                                   | [102] |
| GSH, Cys, Hcy            | Saliva, urine                 | NCS-OTPP                                               | LC-HRMS              | Stationary phase: C18; Mobile phase: A: FA, B: ACN+MeOH; Isocratic elution                                            | 25 min   | 19.2-57.6 nM                                        | [56]  |
| GSH, Cys, Hcy            | Serum                         | NCS-OTPP                                               | LC-HRMS              | Stationary phase: C18; Mobile phase: A: FA, B: ACN+MeOH; Isocratic elution                                            | 25 min   | 2.4-7.2 nM                                          | [57]  |
| LA, HB                   | Saliva                        | PMP                                                    | LC-MS                | Stationary phase: C18; Mobile phase: A: FA, B: ACN+MeOH; Isocratic elution                                            |          | LA: 27 pM, HB: 57 pM                                | [23]  |
| HB                       | Tissues                       | PMP                                                    | LC-MS                | Stationary phase: C18; Mobile phase: A: HCO <sub>2</sub> NH <sub>4</sub> 5 mM (pH 4.0), B: ACN+MeOH; Gradient elution | 26 min   | 0.8-2.8 nM                                          | [106] |
| Amino acids              | Standards                     | N-(4,6-Dichloro-[1,3,5]-triazine-2-yl)-L-leucine (DCT) | LC-UV                | Stationary phase: C18; Mobile phase: A: TFA, B: ACN; Gradient elution                                                 | 45 min   | 0.9-1.1 nM                                          | [97]  |
| Amines, carboxylic acids | Saliva                        | (S)-PyT-N/(R)-PyT-C                                    | LC-MS                | Stationary phase: C18; Mobile phase: A: FA, B: ACN; Isocratic elution                                                 | 16 min   | Amine: 0.1 nM, CA: 0.1 nM                           | [103] |
| Amino acids              | Standards                     | Nap-Btz                                                | LC-UV                | Stationary phase: C18; Mobile phase: A: TEAP 10 mM (pH 3.5), B: ACN; Gradient elution                                 | 35 min   | 5-60 nM                                             | [68]  |
| RS-PEA                   | Plasma                        | PGA                                                    | LC-MS                | Stationary phase: C18; Mobile phase: A: FA, B: ACN; Isocratic elution                                                 | n.r.     | 0.5-2 nM                                            | [59]  |
| Amino acids              | Serum, yogurt                 | PGA-Osu                                                | LC-MS                | Stationary phase: C18; Mobile phase: A: FA, B: ACN; Isocratic elution                                                 | n.r.     | 0.25-1.6 nM                                         | [60]  |

| Analytes          | Matrix                                 | CDA                                                                 | Analytical technique | Separation conditions                                                                                                    | Run time | LOD [M]      | Ref.  |
|-------------------|----------------------------------------|---------------------------------------------------------------------|----------------------|--------------------------------------------------------------------------------------------------------------------------|----------|--------------|-------|
| AA                | Rat plasma                             | COXA-OSu                                                            | LC-MS                | Stationary phase: HILIC; Mobile phase: A: HCO <sub>2</sub> NH <sub>4</sub> 10 mM+FA 10 mM, B: ACN+MeOH; Gradient elution | 60 min   | 2.8-103.6 nM | [58]  |
| AA                | Human plasma                           | OTPTHE                                                              | LC-UV                | Stationary phase: C18; Mobile phase: A: FA, B: ACN; Gradient elution                                                     | 30 min   | 2.5 µM       | [62]  |
| Amino acids       | Urine                                  | BiAC                                                                | LC-MS                | Stationary phase: Phenyl; Mobile phase: A: FA/NH <sub>4</sub> Ac 10 mM, B: ACN; Gradient elution                         | 20 min   | n.r.         | [105] |
| Amino acids       | Urine, plasma                          | D-BPBr                                                              | LC-MS                | Stationary phase: C18; Mobile phase: A: H <sub>2</sub> O, B: ACN; Gradient elution                                       | n.r.     | 0.25nM-12µM  | [63]  |
| Amino acids       | Urine                                  | D-BPCI                                                              | LC-MS                | Stationary phase: C18; Mobile phase: A: H <sub>2</sub> O, B: ACN; Gradient elution                                       | 24 min   | 50pM-12 mM   | [64]  |
| SeMet             | Standards                              | MBIC                                                                | LC-UV                | Stationary phase: C18; Mobile phase: A: TEAP (pH 4.5), B: ACN; Iso-cratic elution                                        | n.r.     | n.r.         | [69]  |
| SeMet             | Standards                              | NEIC                                                                | LC-UV                | Stationary phase: C18; Mobile phase: A: TEAP (pH 4.6), B: ACN; Iso-cratic elution                                        | n.r.     | n.r.         | [69]  |
| Carboxylic acids  | Newborn dried blood spot, human saliva | ANA                                                                 | LC-MS                | Stationary phase: C18; Mobile phase: A: HCO <sub>2</sub> NH <sub>4</sub> 10 mM, B: MeOH; Isocratic elution               | n.r.     | n.r.         | [70]  |
| Amine metabolites | Urine                                  | DIPP-Ala-NHS (16O <sub>2</sub> )/DIPP-L-Ala-NHS (18O <sub>2</sub> ) | LC-MS                | Stationary phase: C18; Mobile phase: A: NH <sub>4</sub> Ac 10 mM, B: ACN; Gradient elution                               | 51 min   | n.r.         | [83]  |
| 2HG               | Synovium, serum                        | TSPC                                                                | LC-MS                | Stationary phase: C18; Mobile phase: A: FA, B: MeOH; Gradient elution                                                    | 32 min   | 0.04-24 nM   | [67]  |
| Carboxylic acids  | Saliva                                 | PCP2                                                                | LC-MS                | Stationary phase: C18; Mobile phase: A: HCO <sub>2</sub> NH <sub>4</sub> 20 mM, B: ACN; Gradient elution                 | 13 min   | 16-260 pM    | [104] |
| 2HG               | Standards, human urine, tissue         | TSPC                                                                | LC-MS                | Stationary phase: C18; Mobile phase: A: FA, B: ACN+MeOH; Gradient elution                                                | n.r.     | 0.12-0.1 nM  | [67]  |
| Ser               | Plasma                                 | (R)-1-Boc-2-PCC                                                     | LC-MS                | Stationary phase: C18; Mobile phase: A: TFA, B: MeOH; Gradient elution                                                   | 25 min   | 0.19 mM      | [65]  |
| Ser               | Plasma, CSF                            | (R)-1-Boc-2-PCC                                                     | LC-MS                | Stationary phase: C18; Mobile phase: A: TFA, B: MeOH; Gradient elution                                                   | 35 min   | n.r.         | [111] |
| Amino acids       | Standards                              | Cu (II), Pro                                                        | TW IMS               | -/-                                                                                                                      | -        | n.r.         | [122] |
| Amino acids       | Standards                              | BBS                                                                 | DMS-MS               | -/-                                                                                                                      | -        | n.r.         | [107] |
| Amino acids       | Standards                              | BBS                                                                 | DMS-MS               | -/-                                                                                                                      | -        | n.r.         | [108] |

**Table S2.** Strategies implemented in untargeted chiral metabolomics studies

| Strategy implemented                                                                                                                                                                                                                                                                                                                                                                                                                                                          | Chiral metabolites       | CDA                                                                                            | LC separation                                      | MS detection                                                                                                      | Application                                                                                                                                                                                                                                                                                    | Ref   |
|-------------------------------------------------------------------------------------------------------------------------------------------------------------------------------------------------------------------------------------------------------------------------------------------------------------------------------------------------------------------------------------------------------------------------------------------------------------------------------|--------------------------|------------------------------------------------------------------------------------------------|----------------------------------------------------|-------------------------------------------------------------------------------------------------------------------|------------------------------------------------------------------------------------------------------------------------------------------------------------------------------------------------------------------------------------------------------------------------------------------------|-------|
| Isotope labeling strategy                                                                                                                                                                                                                                                                                                                                                                                                                                                     | Amine groups             | L-PGA<br>L-PGA-d <sub>5</sub>                                                                  | C18 column<br>1.7 μm particle size, 2.1 mm x100 mm | - triple quadrupole mass spectrometer<br>- ESI-MS/MS in positive mode                                             | PEA spiked in rat plasma                                                                                                                                                                                                                                                                       | [59]  |
|                                                                                                                                                                                                                                                                                                                                                                                                                                                                               | DL-AAs                   | L-PGA-OSu<br>l-PGA[d <sub>5</sub> ]-OSu                                                        |                                                    |                                                                                                                   | Differential analysis of the DL-Ala values in two different yogurt products                                                                                                                                                                                                                    | [60]  |
|                                                                                                                                                                                                                                                                                                                                                                                                                                                                               | Carboxyl/amine groups    | DMT-(S,R)-Pro-OSu<br>DMT3(S,R)-Apy<br><br>iDMT-(S,R)-Pro-OSu<br>iDMT3(S,R)-Apy                 |                                                    | - Q-TOF mass spectrometer<br>- ESI-MS/MS in positive mode<br>*DDA MS/MS of precursor ions; threshold 20000 counts | Chiral metabolomics for carboxyls and amines in AD CSF and comparison with Non-AD patients                                                                                                                                                                                                     | [101] |
|                                                                                                                                                                                                                                                                                                                                                                                                                                                                               | DL-AAs<br>Small peptides | DIPP-Ala-NHS ( <sup>16</sup> O <sub>2</sub> )<br>DIPP-Ala-NHS ( <sup>18</sup> O <sub>2</sub> ) | C18 column<br>5 μm particle size, 2.1 x150 mm      | - Orbitrap mass spectrometer                                                                                      | Relative and absolute quantification of amino acids in human urine                                                                                                                                                                                                                             | [110] |
| Use of opposite enantiomers of CDA for derivatization                                                                                                                                                                                                                                                                                                                                                                                                                         | Amine groups             | DMT-(S,R)-Pro-OSu                                                                              | C18 column<br>1.7 μm particle size, 2.1 mm x100 mm | - triple quadrupole mass spectrometer<br>- ESI-MS/MS in positive mode                                             | <ul style="list-style-type: none"><li>Chiral metabolomics of carboxyls in saliva of diabetic patients and healthy persons</li><li>Chiral metabolomics fingerprinting and chiral metabolomics extraction for carboxyls and amines in brain homogenate of Alzheimer's disease patients</li></ul> | [100] |
|                                                                                                                                                                                                                                                                                                                                                                                                                                                                               | Carboxyl groups          | DMT3(S,R)-Apy                                                                                  |                                                    |                                                                                                                   |                                                                                                                                                                                                                                                                                                |       |
|                                                                                                                                                                                                                                                                                                                                                                                                                                                                               | Hydroxy/amine groups     | (+)/(−) DATAN                                                                                  |                                                    | - Orbitrap mass spectrometer                                                                                      | Chiral Metabolic Profiling of peripheric blood and bone marrow plasma of AML patients                                                                                                                                                                                                          | [91]  |
| Abbreviations: L-PGA: l-Pyroglutamic acid; PEA: 1-phenylethylamine; AA: amino acid; L-PGA-OSu: l-pyroglutamic acid succinimidyl ester; DMT-(S)-Pro-OSu: (S)-2,5-dioxopyrrolidin-1-yl-1-(4,6-dimethoxy-1,3,5-triazin-2-yl) pyrrolidine-2-carboxylate; DMT-3(S)-Apy: (S)-1-(4,6-Dimethoxy-1,3,5-triazin-2-yl)pyrrolidin-3-amine; DDA: data dependent analysis; AD: Alzheimer disease; CSF: cerebrospinal fluid; DATAN: diacetyl-tartaric anhydride; AML: acute myeloid leukemia |                          |                                                                                                |                                                    |                                                                                                                   |                                                                                                                                                                                                                                                                                                |       |

**Table S3.** IMS of chiral AAs. Studies reporting technologies operating in low electric fields

| IMS type | Analysis form                                                                                                         | Chiral reference compound | Analyte | m/z      | D-AA CCS value (Å <sup>2</sup> ) | L-AA CCS value (Å <sup>2</sup> ) | ΔCCS | Δt <sub>d</sub> | Rp-p | Ref.  |
|----------|-----------------------------------------------------------------------------------------------------------------------|---------------------------|---------|----------|----------------------------------|----------------------------------|------|-----------------|------|-------|
| TWIM-MS  | [( <sup>D</sup> AAref) <sub>2</sub> + <sup>D/L</sup> Analyte+Cu <sup>II</sup> -H] <sup>+</sup>                        | D-Pro                     | Phe     | 457.14   | 123.5                            | 127.3                            | 3.8  | 0.11            | 0.44 | [122] |
|          |                                                                                                                       |                           | Arg     | 466.17   | 126.6                            | 127.9                            | 1.3  | 0.04            | -    |       |
|          |                                                                                                                       |                           | Glu     | 439.11   | 121.7                            | 122.7                            | 1.0  | 0.03            | 0.12 |       |
|          |                                                                                                                       |                           | Thr     | 411.12   | 115.3                            | 116.3                            | 1.0  | 0.03            | -    |       |
|          |                                                                                                                       |                           | Gln     | 438.12   | 121.7                            | 123.0                            | 1.3  | 0.04            | -    |       |
|          |                                                                                                                       |                           | Lys     | 438.16   | 123.0                            | 124.3                            | 1.3  | 0.04            | -    |       |
|          |                                                                                                                       |                           | Tyr     | 473.13   | 126.3                            | 130.7                            | 4.4  | 0.14            | 0.50 |       |
|          |                                                                                                                       |                           | Trp     | 496.15   | 127.5                            | 133.7                            | 6.2  | 0.18            | 0.60 |       |
|          |                                                                                                                       | D-Arg                     | Phe     | 575.23   | 119.7                            | 121.1                            | 1.4  | 0.06            | -    |       |
|          |                                                                                                                       | D-Trp                     |         | 635.19   | 155.8                            | 157.0                            | 1.2  | 0.04            | -    |       |
|          |                                                                                                                       | D-Glu                     |         | 521.12   | 115.4                            | 115.7                            | 0.3  | 0.05            | -    |       |
|          |                                                                                                                       | D-Thr                     |         | 465.13   | 146.4                            | 147.7                            | 1.3  | 0.04            | -    |       |
|          |                                                                                                                       | D-His                     |         | 537.15   | 147.5                            | 148.8                            | 1.3  | 0.04            | -    |       |
|          |                                                                                                                       | D-Pro                     |         | 457.14   | 123.5                            | 127.3                            | 3.8  | 0.01            | -    |       |
|          |                                                                                                                       | D-Tyr                     |         | 589.16   | 152.8                            | 154.6                            | 1.8  | 0.06            | -    |       |
|          | [( <sup>D</sup> AAref)+ <sup>D/L</sup> Analyte+Cu <sup>II</sup> -H] <sup>+</sup>                                      | D-Pro                     | Phe     | 342.07   | 102.5                            | 103.9                            | 1.4  | 0.04            | -    |       |
|          |                                                                                                                       | D-Arg                     |         | 401.12   | 119.7                            | 121.1                            | 1.4  | 0.04            | -    |       |
|          |                                                                                                                       | D-Trp                     |         | 431.10   | 122.4                            | 123.0                            | 0.6  | 0.02            | -    |       |
|          |                                                                                                                       | D-Glu                     |         | 374.06   | 115.4                            | 115.7                            | 0.3  | 0.01            | -    |       |
|          |                                                                                                                       | D-Thr                     |         | 346.07   | 104.3                            | 105.0                            | 0.7  | 0.02            | -    |       |
|          |                                                                                                                       | D-His                     |         | 382.08   | 110.5                            | 111.2                            | 0.7  | 0.02            | -    |       |
|          |                                                                                                                       | D-Tyr                     |         | 408.08   | 117.0                            | 117.3                            | 0.3  | 0.01            | -    |       |
|          | [(Cu <sup>II</sup> ) <sub>2</sub> + <sup>D/L</sup> Analyte+( <sup>L</sup> AAref) <sub>3</sub> -4H+ H/Na] <sup>+</sup> | His                       | Trp     | 814      | 176.4                            | 164.3                            | 12.1 | 0.65            | 1.8  | [124] |
|          |                                                                                                                       |                           | Gln     | 756      | 164.7                            | 155.5                            | 9.2  | 0.48            | 1.4  |       |
|          |                                                                                                                       |                           | Tyr     | 791      | 171.9                            | 161.7                            | 10.2 | 0.54            | 1.4  |       |
|          |                                                                                                                       |                           | Thr     | 729      | 160.1                            | 156.0                            | 4.1  | 0.21            | 0.7  |       |
|          |                                                                                                                       | Phe                       | His     | 795      | 171.1                            | 175.9                            | 4.7  | 0.26            | 0.7  |       |
|          |                                                                                                                       | Trp                       | Gln     | 903      | 191.3                            | 180.8                            | 10.5 | 0.59            | 1.5  |       |
|          |                                                                                                                       |                           | Tyr     | 938      | 193.8                            | 183.9                            | 9.8  | 0.56            | 1.2  |       |
|          |                                                                                                                       |                           | Glu     | 904      | 190.0                            | 181.5                            | 8.5  | 0.48            | 1.2  |       |
|          |                                                                                                                       |                           | Met     | 906      | 193.4                            | 187.0                            | 6.4  | 0.37            | 0.9  |       |
|          |                                                                                                                       |                           | Phe     | 922      | 194.7                            | 189.5                            | 5.2  | 0.30            | 0.7  |       |
|          |                                                                                                                       | Tyr                       | Glu     | 654      | 144.5                            | 150.3                            | 5.8  | 0.29            | 1.0  |       |
|          |                                                                                                                       |                           | Arg     | 840      | 177.3                            | 184.0                            | 6.7  | 0.37            | 1.0  |       |
|          |                                                                                                                       |                           | His     | 843      | 180.5                            | 185.0                            | 4.5  | 0.25            | 0.7  |       |
|          |                                                                                                                       |                           |         |          |                                  |                                  |      |                 |      |       |
| TIMS     | [FLEC-AA+Na-H] <sup>+</sup>                                                                                           | -                         | Ile     | 390.1656 | 190.0                            | 187.1                            | 2.9  | -               | -    | [81]  |
|          |                                                                                                                       |                           | Leu     | 390.1681 | 191.9                            | 188.7                            | 3.2  | -               | -    |       |

|  |                                           |                                            |        |          |                    |       |       |     |     |  |       |
|--|-------------------------------------------|--------------------------------------------|--------|----------|--------------------|-------|-------|-----|-----|--|-------|
|  |                                           |                                            | Val*   | 376.1526 | 1: 182.3; 2: 185.3 |       | 3.0   | -   | -   |  |       |
|  | [FLEC-AA+2Na-H] <sup>+</sup>              |                                            | Asn    | 413.1083 | 194.4              | 183.9 | 10.5  | -   | -   |  |       |
|  |                                           |                                            | Glu*   | 428.1080 | 1: 190.0; 2: 197.4 |       | 7.4   | -   | -   |  |       |
|  |                                           |                                            | SeMet  | 478.0475 | 195.1              | 198.6 | 3.5   | -   | -   |  |       |
|  |                                           |                                            | Aad    | 442.1193 | 195.4              | 199.0 | 3.6   | -   | -   |  |       |
|  |                                           |                                            | Pipe   | 410.1342 | 187.9              | 192.4 | 4.5   | -   | -   |  |       |
|  |                                           |                                            | Gln    | 427.1243 | 197.1              | 192.0 | 5.1   | -   | -   |  |       |
|  |                                           |                                            | Pro    | 396.1175 | 1: 189.8           |       | -     | -   | -   |  |       |
|  |                                           |                                            | Thr    | 400.1117 | 1: 187.0           |       | -     | -   | -   |  |       |
|  |                                           |                                            | Arg    | 455.1700 | 199.7              | 202.5 | 2.8   | -   | -   |  |       |
|  |                                           |                                            | Ala    | 370.1008 | 1: 180.4           |       | -     | -   | -   |  |       |
|  |                                           |                                            | Met    | 430.1046 | 189.8              | 192.2 | 2.4   | -   | -   |  |       |
|  |                                           |                                            | Phe    | 446.133  | 196.8              | 190.6 | 6.2   | -   | -   |  |       |
|  |                                           |                                            | Ser    | 386.099  | 185.1              | 181.0 | 4.1   | -   | -   |  |       |
|  |                                           |                                            | Trp    | 485.1444 | 207.1              | 201.3 | 5.8   | -   | -   |  |       |
|  |                                           | [FLEC <sub>2</sub> -AA+2Na-H] <sup>+</sup> |        | Orn      | 649.2304           | 239.4 | 242.9 | 3.5 | -   |  | -     |
|  |                                           |                                            | Lys    | 663.2447 | 237.5              | 240.0 | 2.5   | -   | -   |  |       |
|  |                                           |                                            | Tyr    | 698.2138 | 254.5              | 249.6 | 4.9   | -   | -   |  |       |
|  |                                           |                                            | Hys    | 672.2054 | 245.5              | 248.3 | 2.8   | -   | -   |  |       |
|  |                                           |                                            | Orn*   | 617.2803 | DL: 240.3          |       | -     | -   | -   |  |       |
|  | [FLEC <sub>x</sub> -AA+2Li] <sup>2+</sup> |                                            | SeMet* | 446.1019 | DL: 193.3          |       | -     | -   | -   |  |       |
|  |                                           |                                            | Orn*   | 649.2281 | 1: 237.7; 2: 241.5 |       | 3.8   | -   | -   |  |       |
|  | [FLEC <sub>x</sub> -AA+2Na] <sup>2+</sup> |                                            | SeMet* | 478.0497 | 1: 194.9; 2: 198.3 |       | 3.4   | -   | -   |  |       |
|  |                                           |                                            | Orn*   | 681.1775 | 1: 239.9; 2: 242.4 |       | 2.5   | -   | -   |  |       |
|  | [FLEC <sub>x</sub> -AA+2K] <sup>2+</sup>  |                                            | SeMet* | 510.0001 | DL: 203.8          |       | -     | -   | -   |  |       |
|  |                                           |                                            |        |          |                    |       |       |     |     |  |       |
|  | [S-NAP-AA-H] <sup>-</sup>                 | -                                          |        | Ala      | 300.1240           |       |       |     | 1.0 |  | [125] |
|  |                                           |                                            |        | Asp      | 344.1140           |       |       |     | 0   |  |       |
|  |                                           |                                            |        | Glu      | 358.1304           |       |       |     | 0   |  |       |
|  |                                           |                                            |        | Met      | 360.1274           |       |       |     | 0.8 |  |       |
|  |                                           |                                            |        | His      | 366.1468           |       |       |     | 0.4 |  |       |
|  |                                           |                                            |        | Phe      | 376.1553           |       |       |     | 0.9 |  |       |
|  |                                           |                                            |        | Tyr      | 392.1503           |       |       |     | 0.7 |  |       |
|  |                                           |                                            |        | Trp      | 415.1663           |       |       |     | 0.7 |  |       |
|  | [S-NAP-AA-H+NaOAc] <sup>-</sup>           | -                                          |        | Ser      | 398.1227           |       |       |     | 1.1 |  |       |
|  |                                           |                                            |        | Val      | 410.1582           |       |       |     | 1.9 |  |       |
|  |                                           |                                            |        | Gln      | 439.1486           |       |       |     | 0.6 |  |       |
